# Supplementary material for: Novel secretome-to-transcriptome integrated or secreto-transcriptomic approach to reveal liquid biopsy biomarkers for predicting individualized prognosis of breast cancer patients
Source: PubMed Central journal article supplement (PMC6543675; doi:10.1186/s12920-019-0530-7), 2019-05-30

A.

Extracellular Matrix Organization

Protein Folding

Proteolysis

DNA Packaging

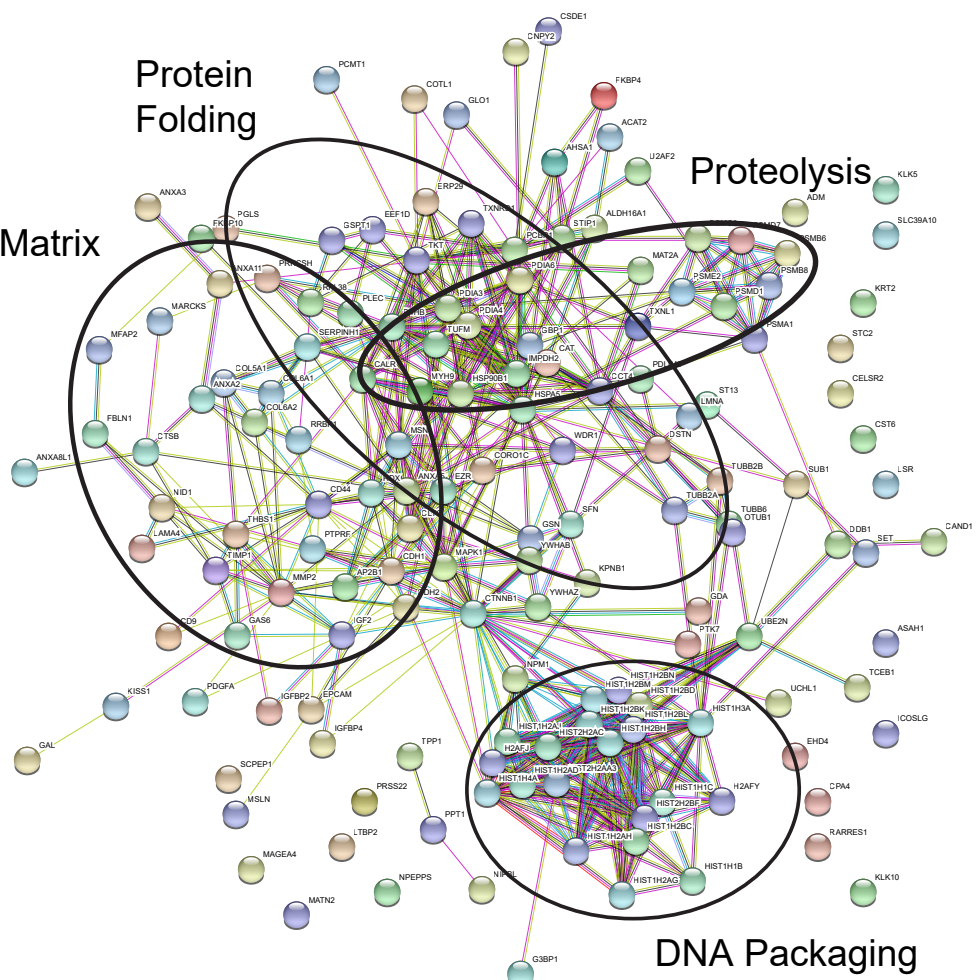

B.

Response to Wounding

Protein Localization

Negative Regulation of Cell Death

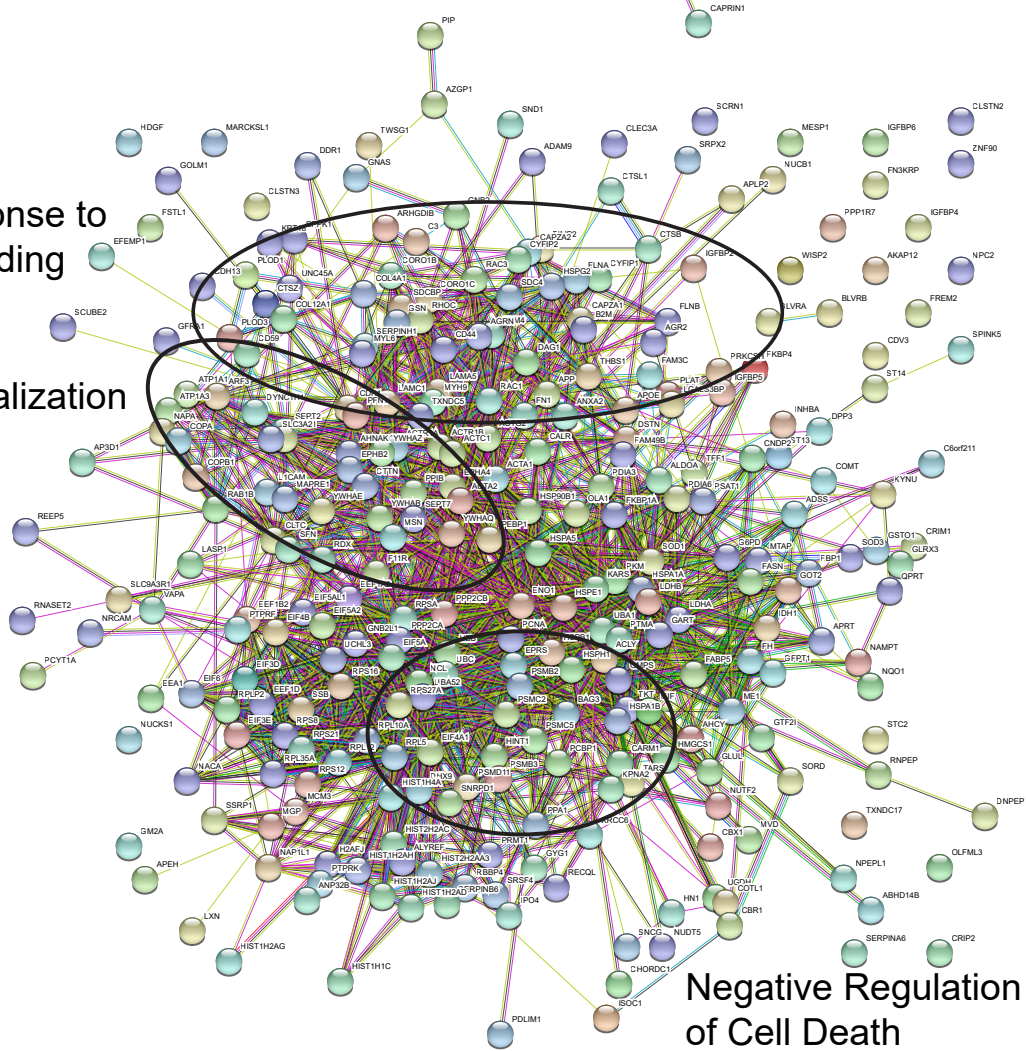

Supplement: 12920_2019_530_MOESM4_ESM.pdf [file 12920_2019_530_MOESM4_ESM.pdf]
