# Supplementary material for: Novel secretome-to-transcriptome integrated or secreto-transcriptomic approach to reveal liquid biopsy biomarkers for predicting individualized prognosis of breast cancer patients
Source: PubMed Central journal article supplement (PMC6543675; doi:10.1186/s12920-019-0530-7), 2019-05-30

**A.** Overall Survival for altered lumB TCGA samples compared to not altered lumB TCGA samples  
 up = EEF1A2,EIF4B,HSPB1,KRT18  
 study = TCGA (Cell 2015)

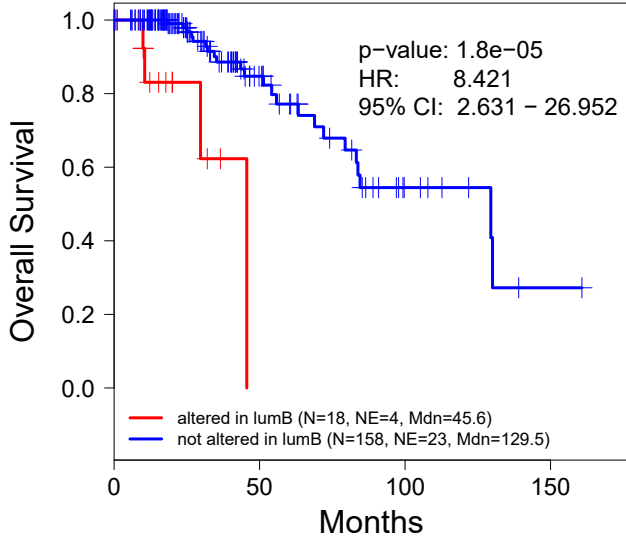

**B.** Overall Survival for altered lumB TCGA samples compared to not altered lumB TCGA samples  
 up = EEF1A2,EIF4B,HSPB1,KRT18  
 study = METABRIC

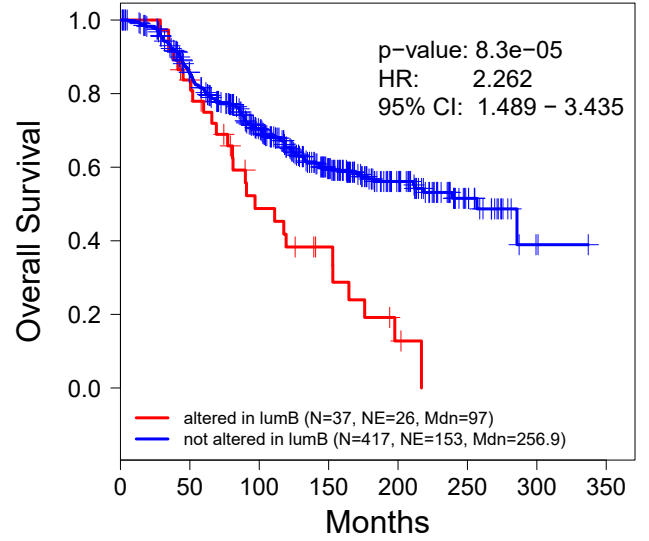

**C.** Overall Survival for altered lumB TCGA samples compared to not altered lumB TCGA samples  
 up = AGR2,CYFIP2,KRT18,RAB1B  
 study = TCGA (Cell 2015)

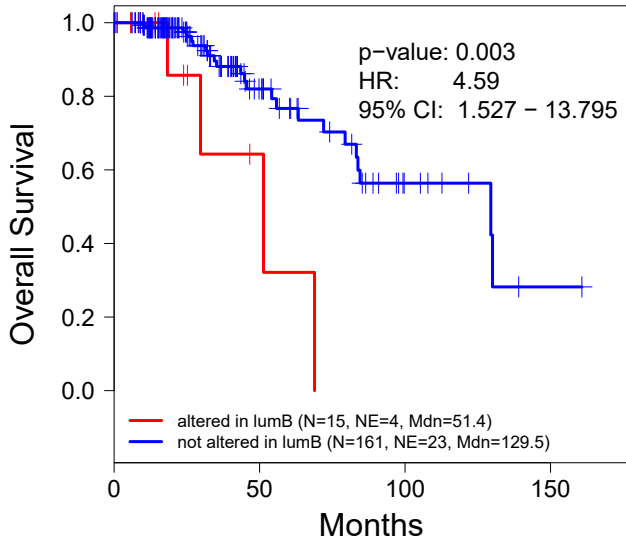

**D.** Overall Survival for altered lumB TCGA samples compared to not altered lumB TCGA samples  
 up = AGR2,CYFIP2,KRT18,RAB1B  
 study = METABRIC

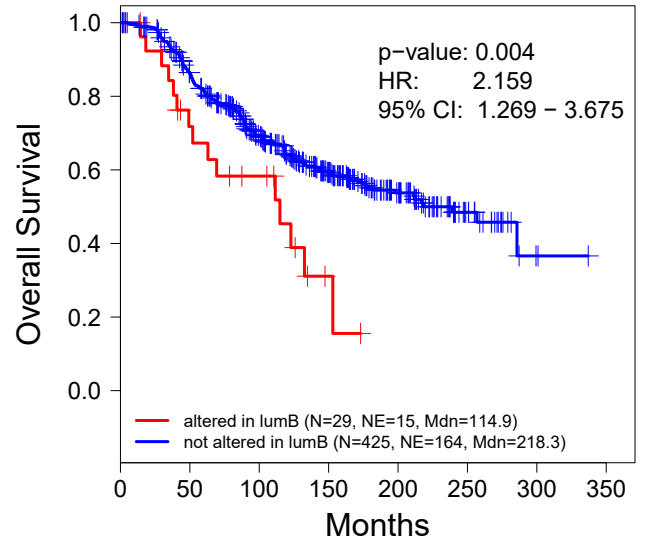

Supplement: 12920_2019_530_MOESM6_ESM.pdf [file 12920_2019_530_MOESM6_ESM.pdf]
