# Supplementary material for: Novel secretome-to-transcriptome integrated or secreto-transcriptomic approach to reveal liquid biopsy biomarkers for predicting individualized prognosis of breast cancer patients
Source: PubMed Central journal article supplement (PMC6543675; doi:10.1186/s12920-019-0530-7), 2019-05-30

**A.** Overall Survival for altered Her2 TCGA samples compared to not altered Her2 TCGA samples  
up = CAPZA2,CBX1,G6PD,NQO1  
study = TCGA (Cell 2015)

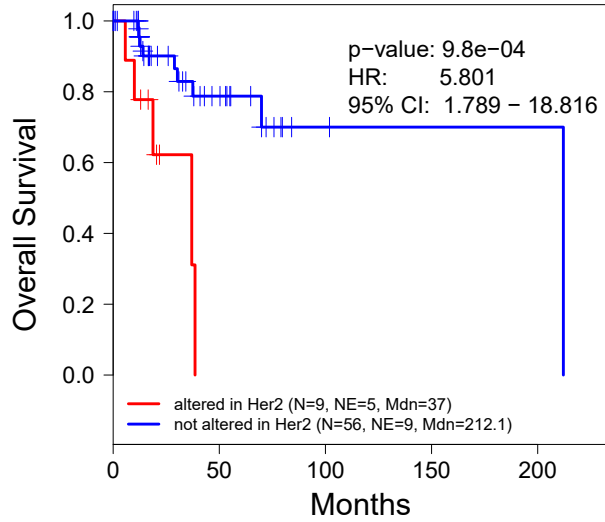

**B.** Overall Survival for altered Her2 METABRIC samples compared to not altered Her2 METABRIC samples  
up = CAPZA2,CBX1,G6PD,NQO1  
study = METABRIC

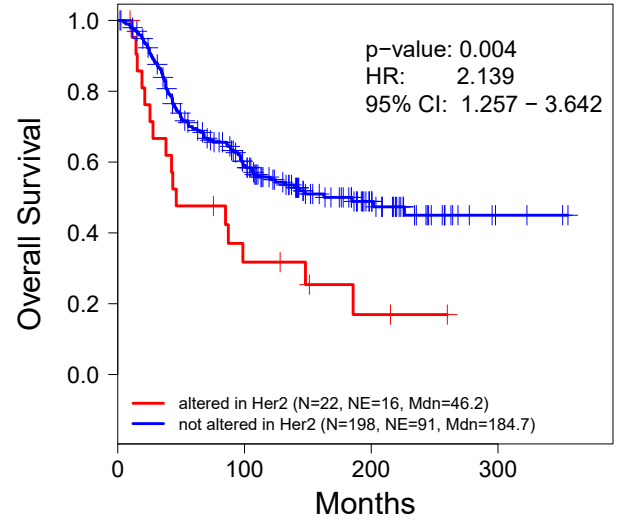

**C.** Overall Survival for altered Her2 TCGA samples compared to not altered Her2 TCGA samples  
up = CYFIP1,DDR1,GYG1  
study = TCGA (Cell 2015)

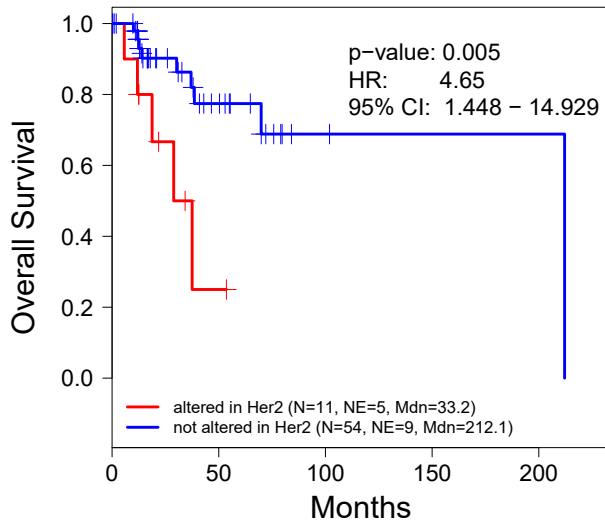

**D.** Overall Survival for altered Her2 METABRIC samples compared to not altered Her2 METABRIC samples  
up = CYFIP1,DDR1,GYG1  
study = METABRIC

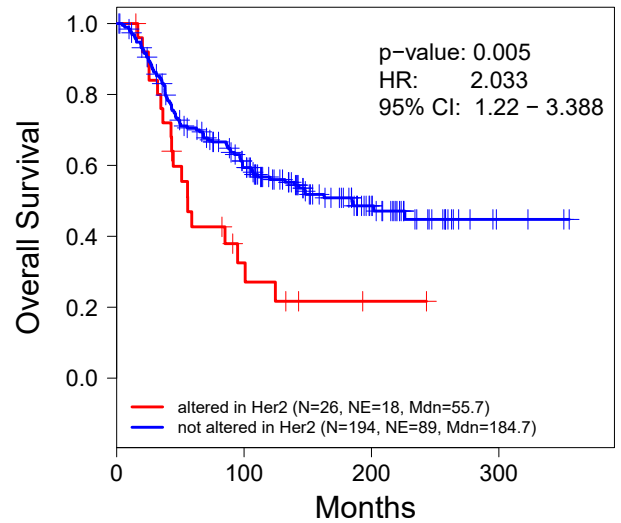

**E.** Overall Survival for altered Her2 TCGA samples compared to not altered Her2 TCGA samples  
up = CYFIP1,G6PD,KYNU,PSMC2  
study = TCGA (Cell 2015)

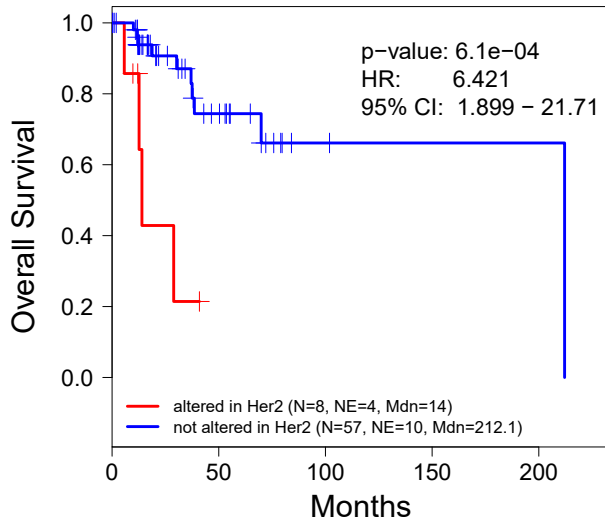

**F.** Overall Survival for altered Her2 METABRIC samples compared to not altered Her2 METABRIC samples  
up = CYFIP1,G6PD,KYNU,PSMC2  
study = METABRIC

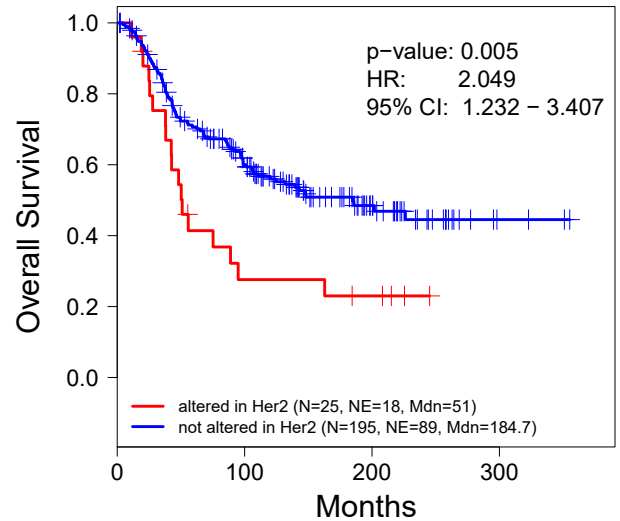

Supplement: 12920_2019_530_MOESM7_ESM.pdf [file 12920_2019_530_MOESM7_ESM.pdf]
