# Supplementary material for: Novel secretome-to-transcriptome integrated or secreto-transcriptomic approach to reveal liquid biopsy biomarkers for predicting individualized prognosis of breast cancer patients
Source: PubMed Central journal article supplement (PMC6543675; doi:10.1186/s12920-019-0530-7), 2019-05-30

A.

Overall Survival for altered Basal TCGA samples compared to not altered Basal TCGA samples  
up = ANXA2,CALR,MFAP2,SERPINH1  
study = TCGA (Cell 2015)

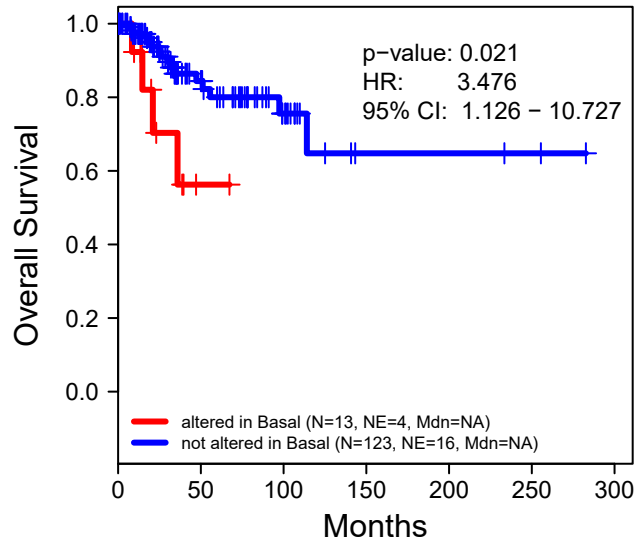

B.

Overall Survival for altered Basal TCGA samples compared to not altered Basal TCGA samples  
up = ADM,MAGEA4,PRKCSH  
study = TCGA (Cell 2015)

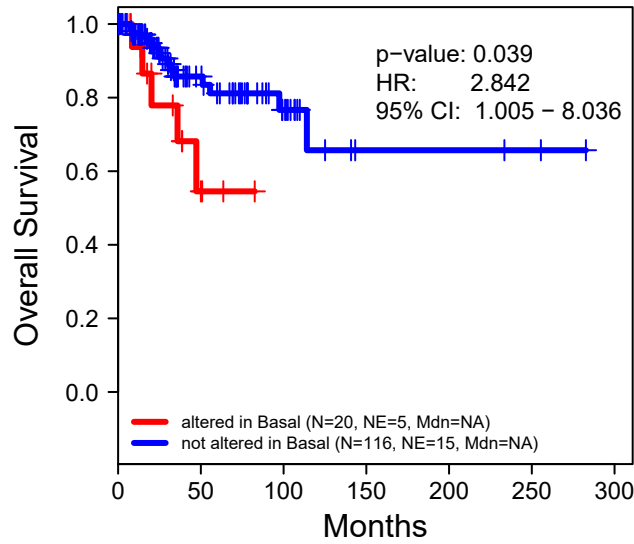

C.

Overall Survival for altered luminal TCGA samples compared to not altered luminal TCGA samples  
up = BLVRB,EIF4B,ISOC1  
study = TCGA (Cell 2015)

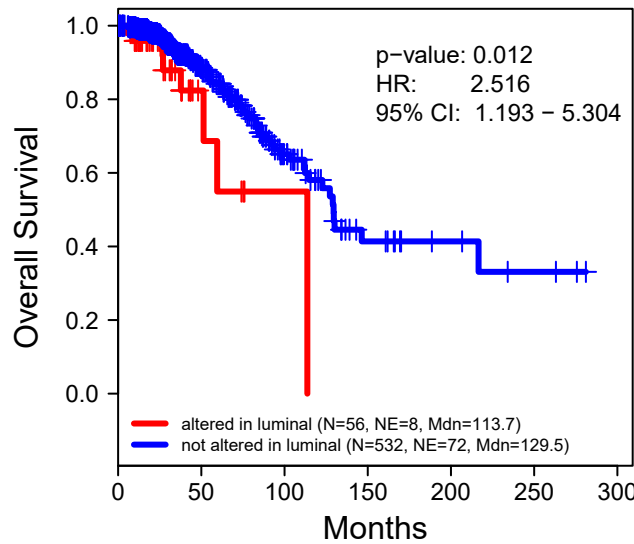

Supplement: 12920_2019_530_MOESM8_ESM.pdf [file 12920_2019_530_MOESM8_ESM.pdf]
